# Supplementary material for: Translation efficiency covariation across cell types is a conserved organizing principle of mammalian transcriptomes
Source: PubMed Central journal article supplement — bioRxiv. 2025 May 15:2024.08.11.607360. Originally published 2024 Aug 11. Preprint. [Version 3] doi: 10.1101/2024.08.11.607360 (PMC11326257; doi:10.1101/2024.08.11.607360), 2025-05-15
Supplement: media-1.pdf [file media-1.pdf]

# 1 Extended Figures

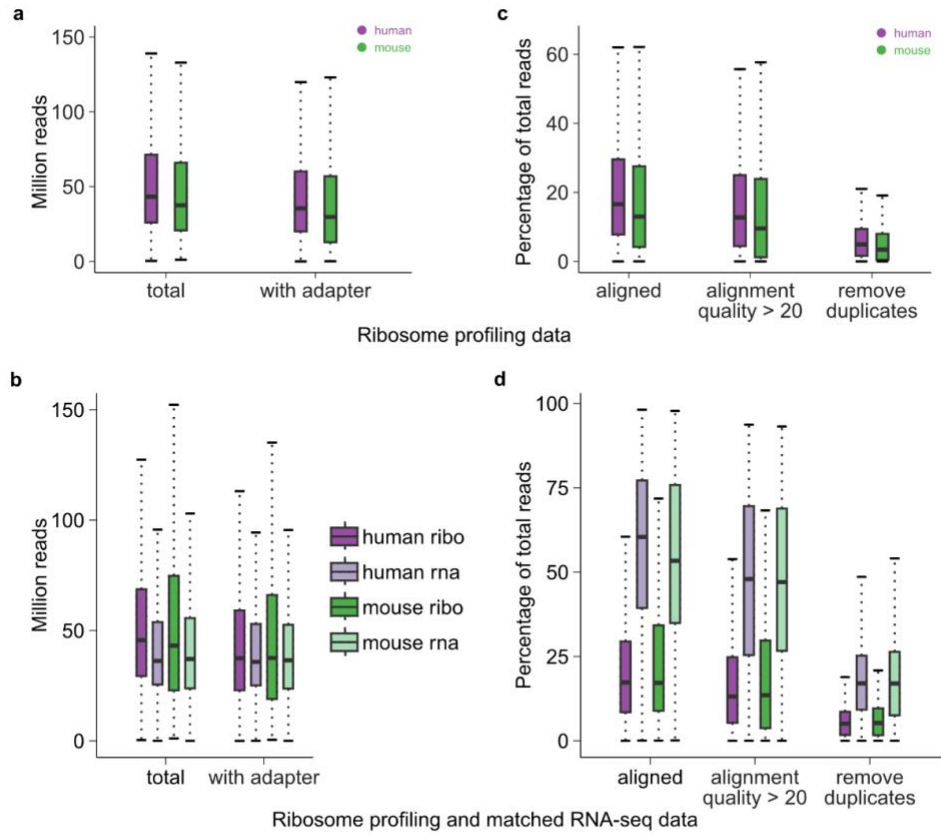

2

3 **ExtendedDataFig. 1 | Sequencing quality of ribosome profiling data with matched RNA-seq**  
4 **data when available (supplementary text): a**, Distribution of read counts for ribosome profiling  
5 data in RiboBase. In all figure panels, the horizontal line corresponds to the median. The box  
6 represents the interquartile range and the whiskers extend to 1.5 times of it. **b**, Distribution plot  
7 similar to panel A for ribosome profiling data with matched RNA-seq. **c**, Distribution of the  
8 proportion of read count aligned to transcripts, read counts with high-quality alignments, and the  
9 percentage of reads remaining after PCR deduplication, relative to the total number of reads from  
10 panel A. **d**, Similar plot as panel C for ribosome profiling with matched RNA-seq.

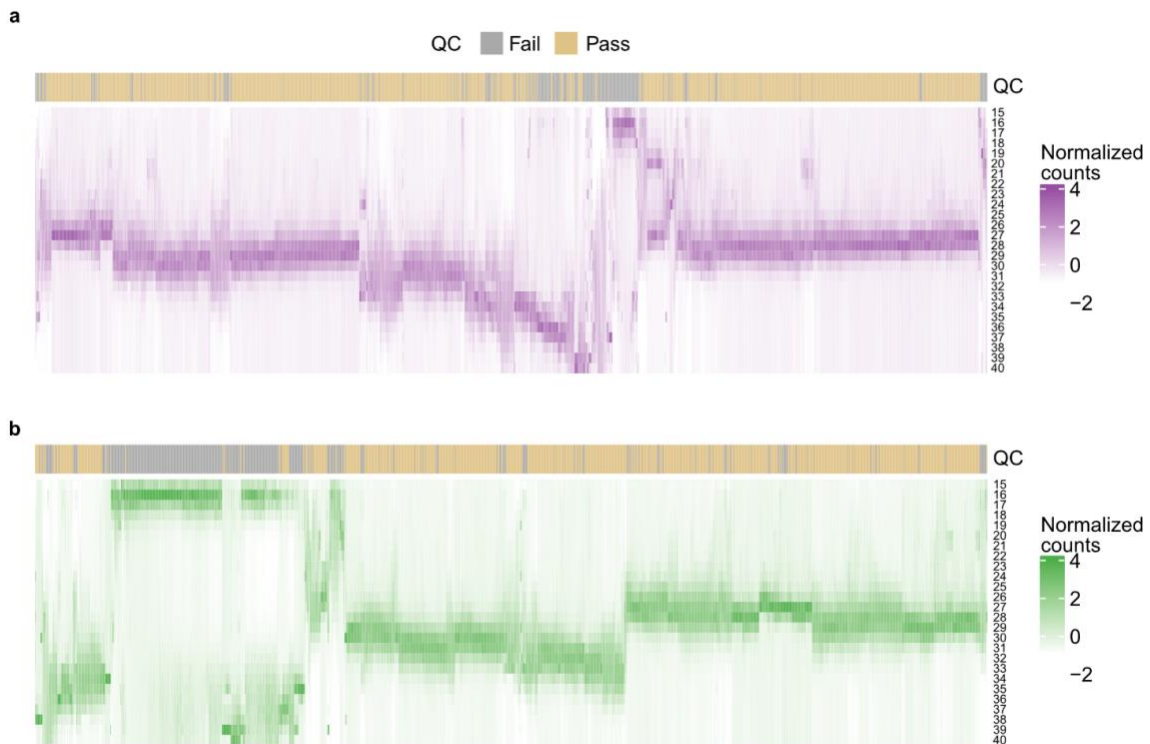

11

12 **ExtendedDataFig. 2 | Length distribution of RPFs for human and mouse samples: a**, The read  
 13 length distribution of RPFs aligned to coding sequences for all human experiments. The color in  
 14 the heatmap represents the z-score adjusted RPF counts (Methods). Each experiment where the  
 15 percentage of RPFs mapping to CDS was greater than 70% and achieving sufficient coverage of  
 16 the transcript ( $\geq 0.1X$ ) was annotated as QC-pass. **b**, Similar to panel A for mouse samples.

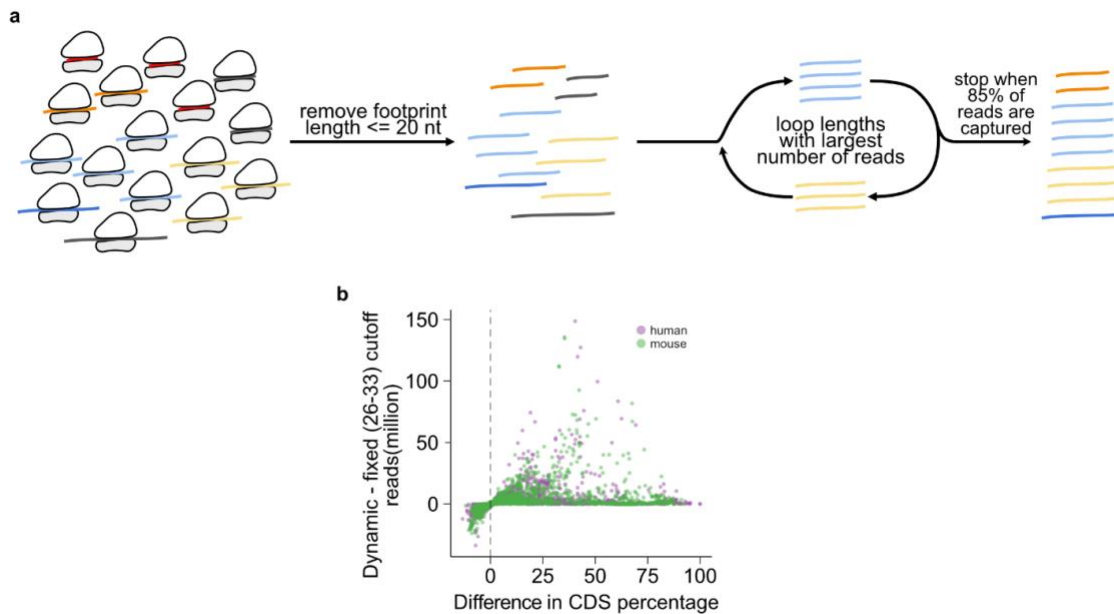

17

18 **ExtendedDataFig. 3 | Schematic for method to select range of RPF lengths:** **a**, RPFs shorter  
 19 than 21 nucleotides were removed, then we identified the RPF length with the highest number of  
 20 reads mapping to CDS to serve as the starting point. Subsequently, we compared one nucleotide  
 21 longer or shorter than the first and chose the length with the most reads again. This looping process  
 22 continued until at least 85% of the total CDS mapping RPFs were included. **b**, We compared the  
 23 usable reads selected with two different boundary cutoffs (y-axis) and the proportion of these  
 24 selected reads that map to the coding regions (x-axis) for each ribosome profiling experiment.

25

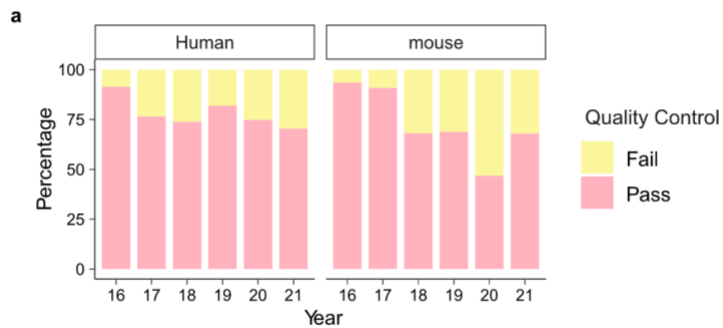

26

27 **ExtendedDataFig. 4 | Data quality of ribosome profiling experiments from 2016 to 2021: a,**  
 28 The percentage of ribosome profiling experiments from GEO that pass or fail quality control (the  
 29 percentage of RPFs mapping to CDS was greater than 70% and achieving at least 0.1X coverage  
 30 of the transcript as QC pass).

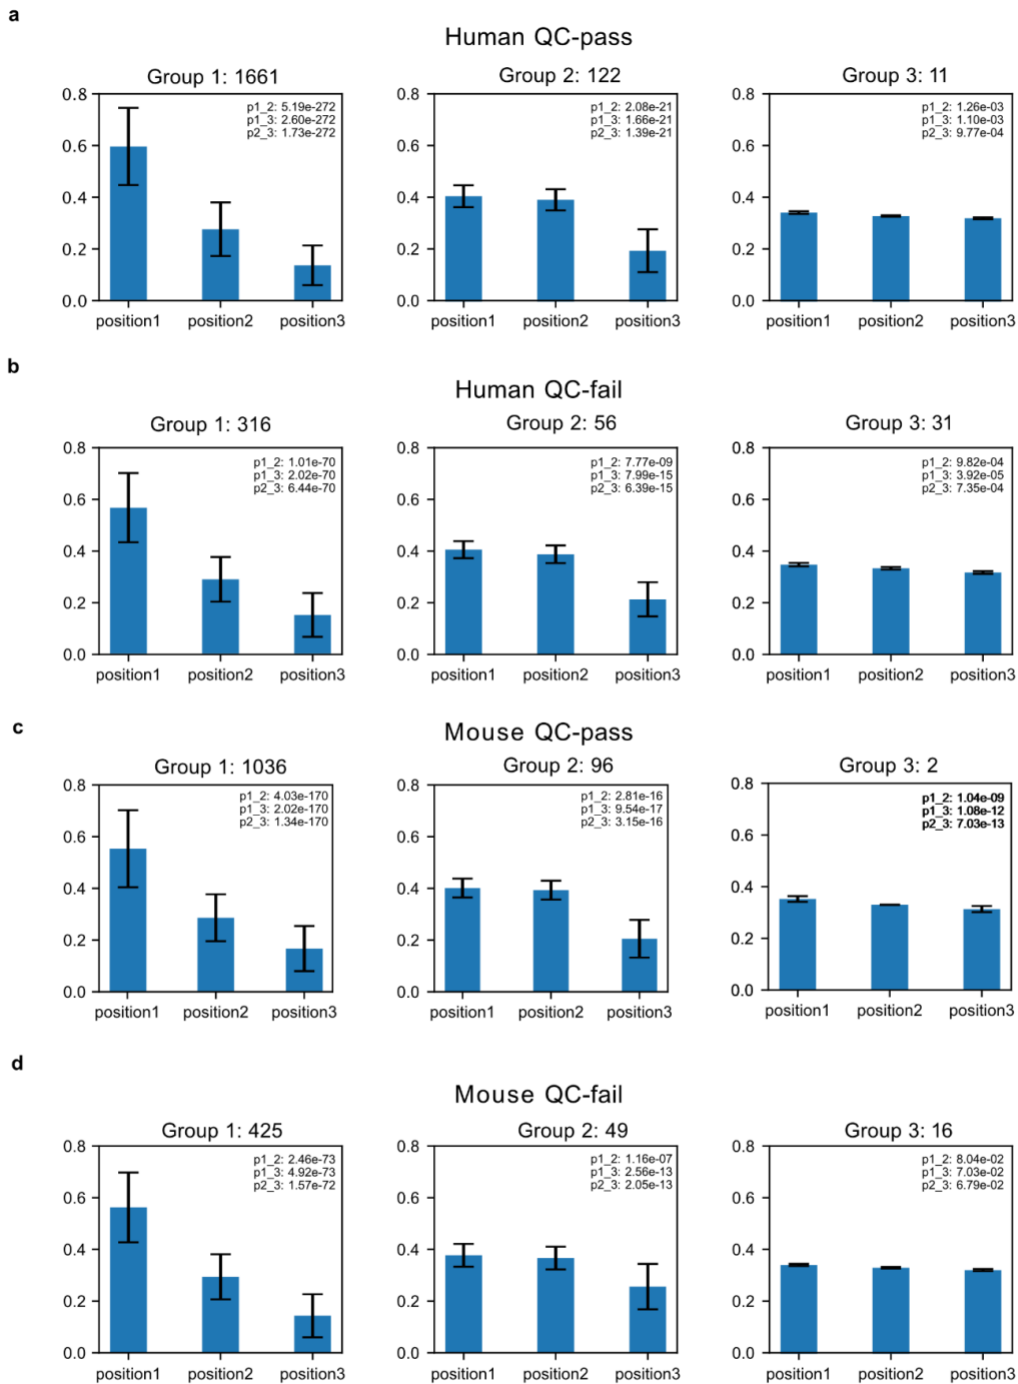

31

32 **ExtendedDataFig. 5 | Three nucleotide periodicity of ribosome profiling data: a-d**, In  
 33 ribosome profiling experiments from RiboBase, samples were classified according to distinct

34 periodicity patterns (Methods). For all figure panels, we added error bars to represent the standard  
35 deviation across samples. Statistical significance was assessed using the Wilcoxon test, and the p-  
36 values were subsequently adjusted for all 33 comparisons using the Benjamini-Hochberg method.  
37 We considered the Group 1 pattern as indicative of the expected three nucleotide periodicity  
38 patterns.

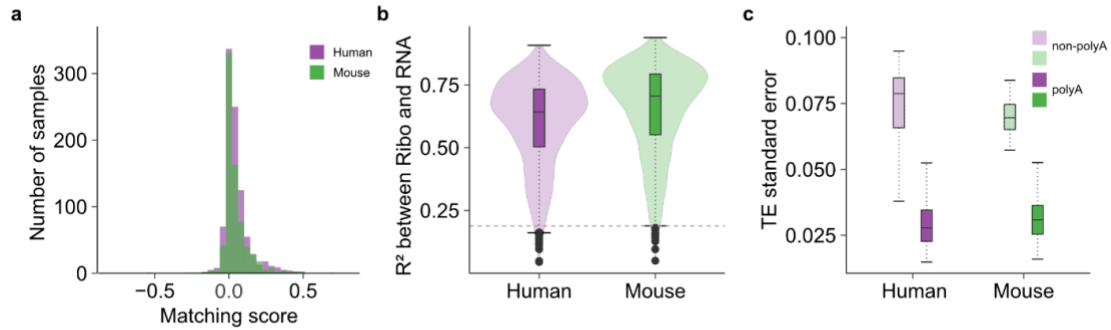

40

41 **ExtendedDataFig. 6 | Validation of ribosome profiling and RNA-seq matching and gene**  
 42 **selection for TE calculation:** **a**, We calculated the coefficient of determination ( $R^2$ ) between a  
 43 specific ribosome profiling experiment and its corresponding RNA-seq from RiboBase.  
 44 Additionally, we determined the average  $R^2$  for all other pairings for the same ribosome profiling  
 45 sample with other RNA-seq data from the same study. The matching score represents the  
 46 difference in  $R^2$  values between these two (x-axis; Methods). **b**, A dashed line at 0.188 serves as  
 47 the threshold to identify samples with poor matching. In each figure panel containing boxplots, the  
 48 horizontal line corresponds to the median. The box represents the IQR and the whiskers extend to  
 49 1.5 times of it. **c**, Distribution of standard error of TE values across tissue and cell lines (y-axis)  
 50 for genes with polyA and without polyA tails.

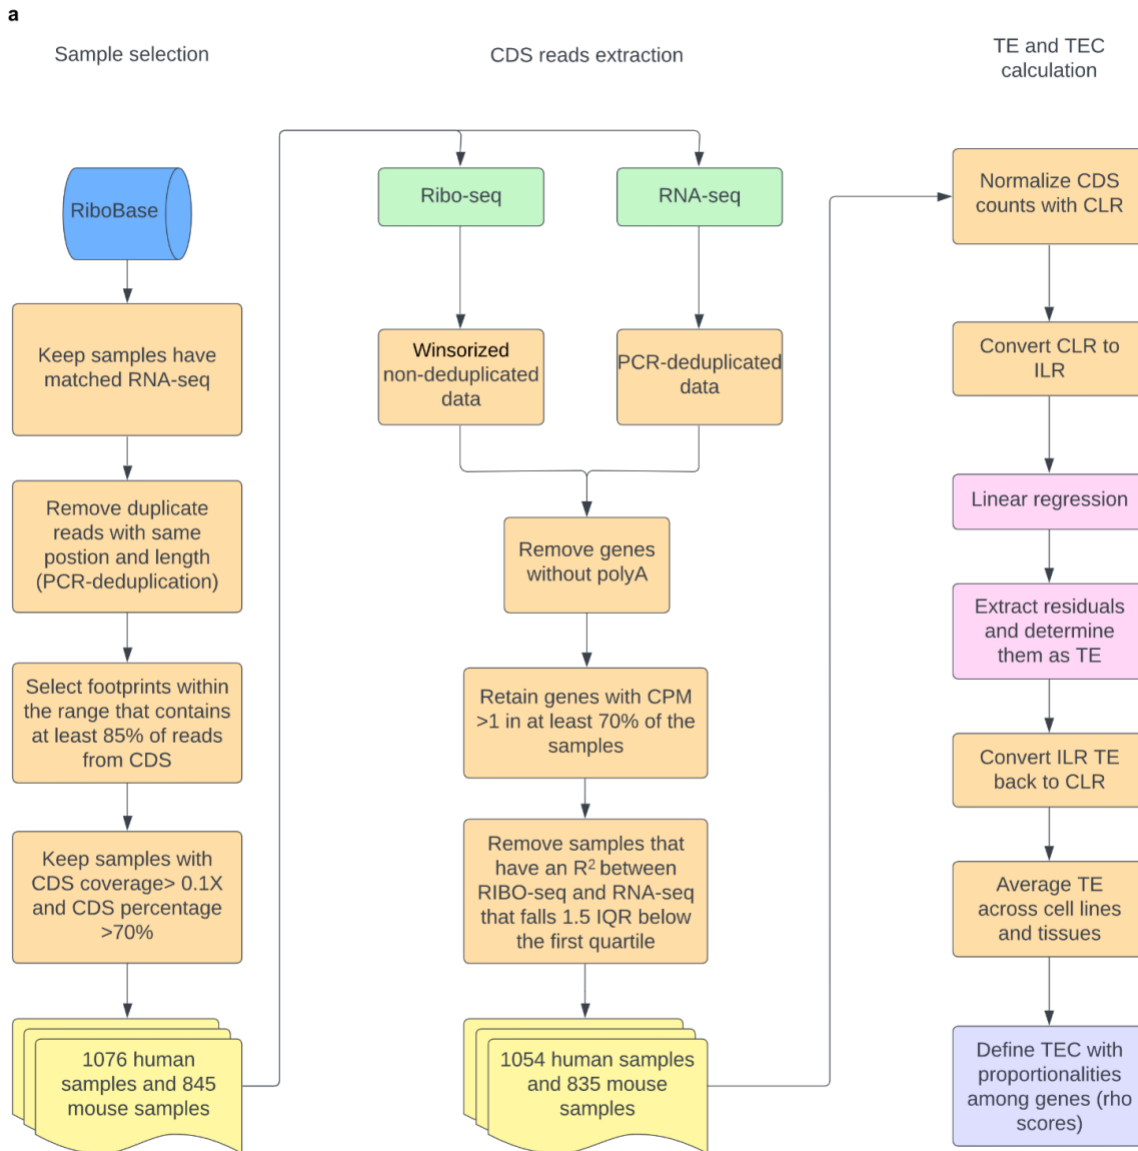

51

52 **ExtendedDataFig. 7 | Detailed workflow of data processing for TE and TEC calculations: a,**  
 53 We selected ribosome profiling data with matched RNA-seq and removed duplicated reads with  
 54 identical positions and lengths (PCR-deduplication). We set the RPF read length range for  
 55 individual samples with our dynamic cutoff and filtered out ribosome profiling experiments that  
 56 failed quality control. After selecting high-quality samples, we reprocessed all these ribosome  
 57 profiling experiments using the winsorization method with non-deduplicated data. We removed



58 genes without polyA tails and kept genes with sufficient counts per million RPFs. After obtaining  
59 RPF counts from the coding regions for both ribosome profiling and RNA-seq, we performed CLR  
60 normalization and compositional linear regression, defining the residuals as TE for each gene in  
61 each sample. We averaged this sample-level TE based on cell lines and tissues. TEC is further  
62 calculated with rho scores<sup>50</sup>. To build an RNA co-expression matrix, we transformed CDS counts  
63 from RNA-seq experiments using CLR, averaged them based on cell lines and tissue, and  
64 calculated pairwise proportionalities (rho scores).

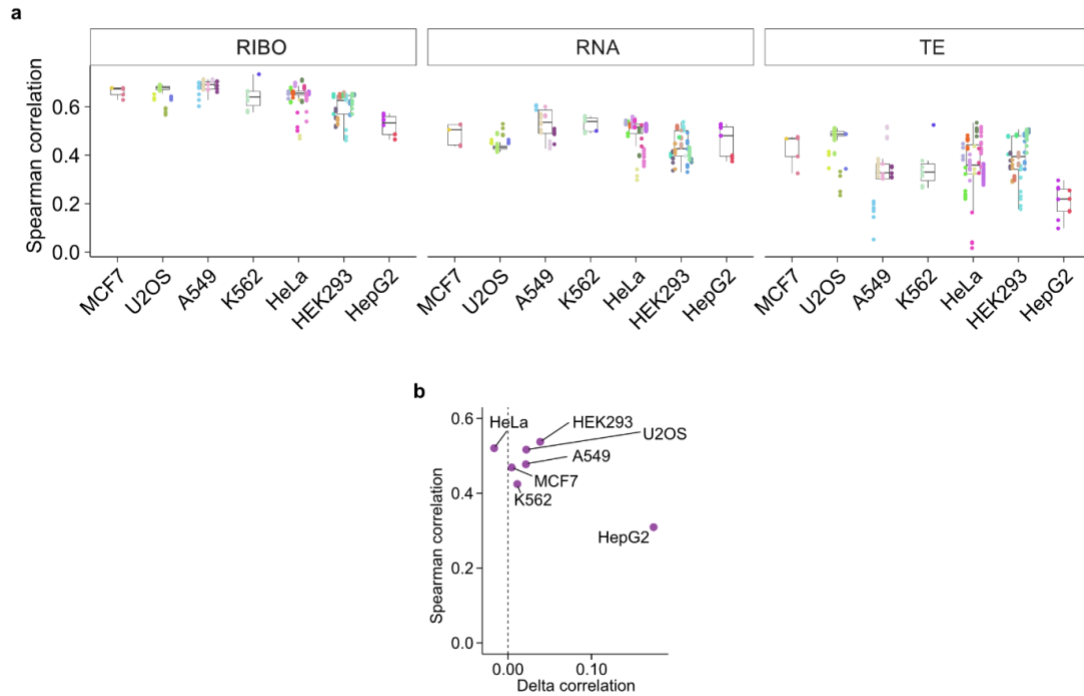

67 **ExtendedDataFig. 8 | Spearman correlation between TE and protein abundance:** **a**, The  
 68 correlation between protein abundance and clr-transformed RPF counts from ribosome profiling  
 69 (left), clr-transformed read counts from RNA-seq (middle), or TE calculated with winsorized RPFs  
 70 counts using the linear regression model (right). Individual dots indicate specific experiments  
 71 colored according to study. In the boxplot, the horizontal line corresponds to the median. The box  
 72 represents the IQR and the whiskers extend to 1.5 times of this range. **b**, TE was calculated with  
 73 winsorized RPF counts without deduplication or with deduplication based on position and  
 74 fragment length. The Spearman correlation coefficient between TE calculated with winsorized  
 75 RPF counts and protein abundance<sup>100</sup> (y-axis) was plotted against “delta correlation” (x-axis)  
 76 defined by subtracting the correlation values obtained with PCR deduplication from those obtained  
 77 with the method using winsorized RPF counts without deduplication.

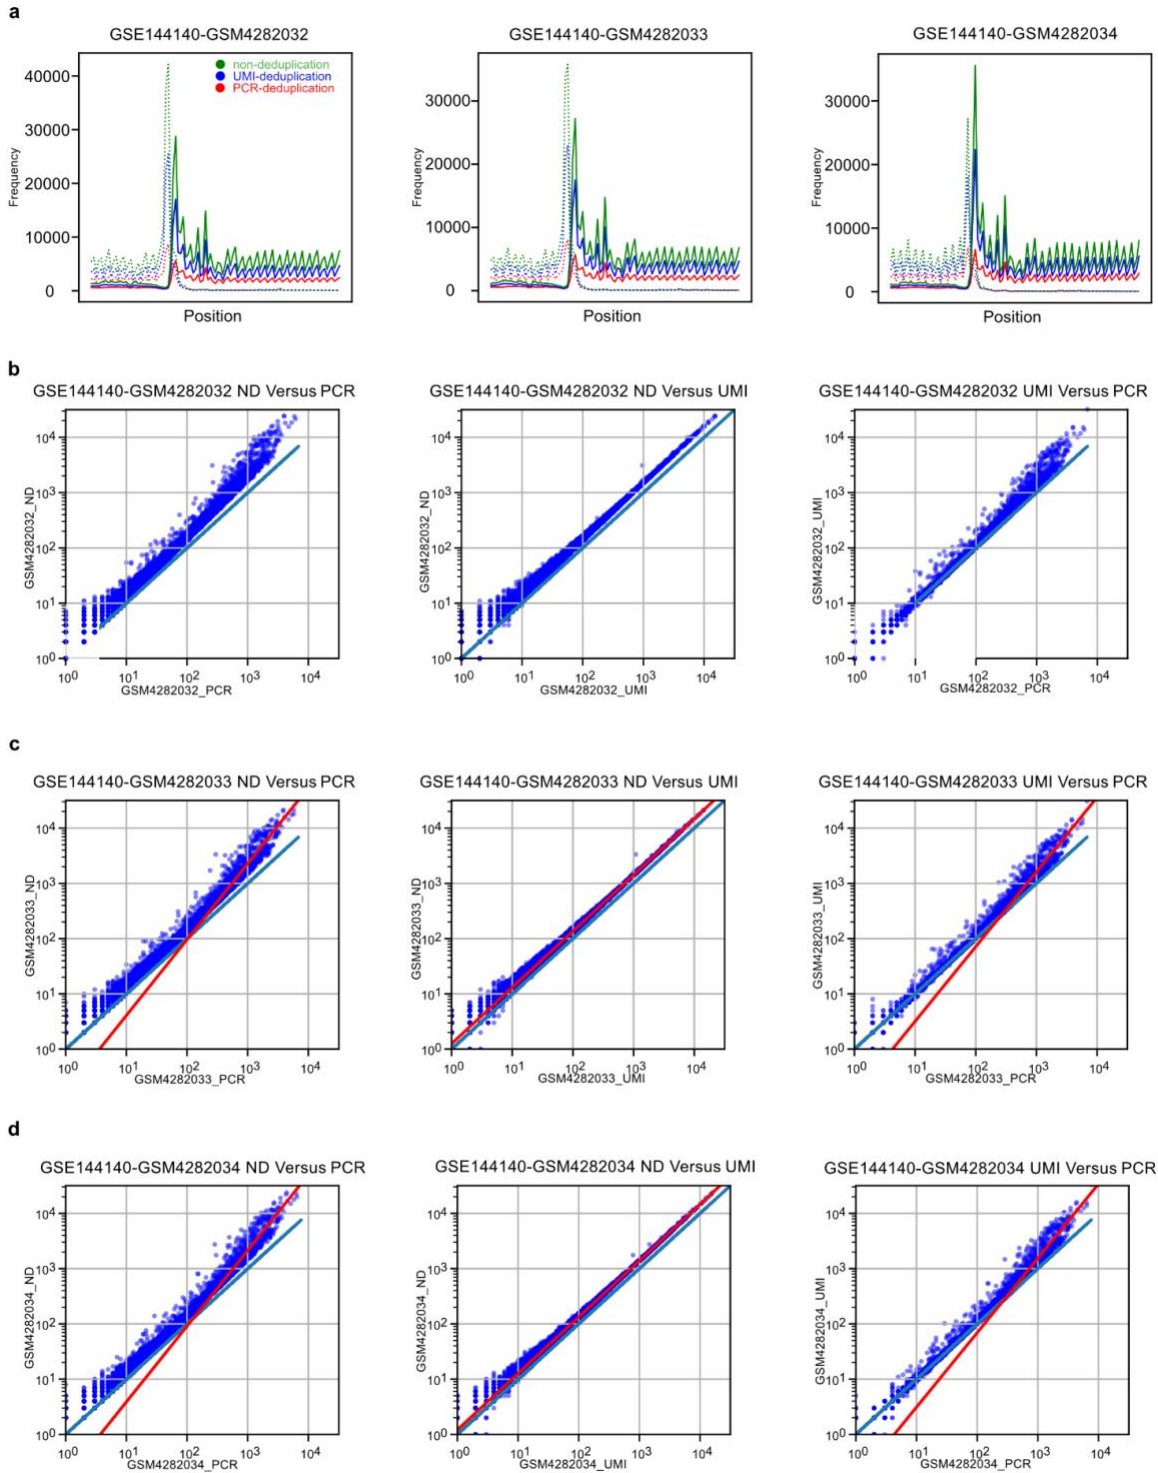

79

80 **ExtendedDataFig. 9 | PCR vs. UMI deduplication comparison for GSE144140: a, Metagene**

81 plots centered on the start codon for samples GSM4282032 (RPFs range: 28-36 nt), GSM4282033  
82 (RPFs range: 28-36 nt range), and GSM4282034 (RPFs range: 26-35 nt range) were plotted using  
83 three different deduplication methods: non-deduplication (ND), UMI-deduplication (UMI), and  
84 PCR-deduplication (PCR). **b**, Correlation of gene counts for GSM4282032 between the three  
85 deduplication methods. A blue diagonal line represents a 1:1 ratio in all figure panels. Same  
86 analysis as panel B for GSM4282033 **c**, and GSM4282034 **d**.

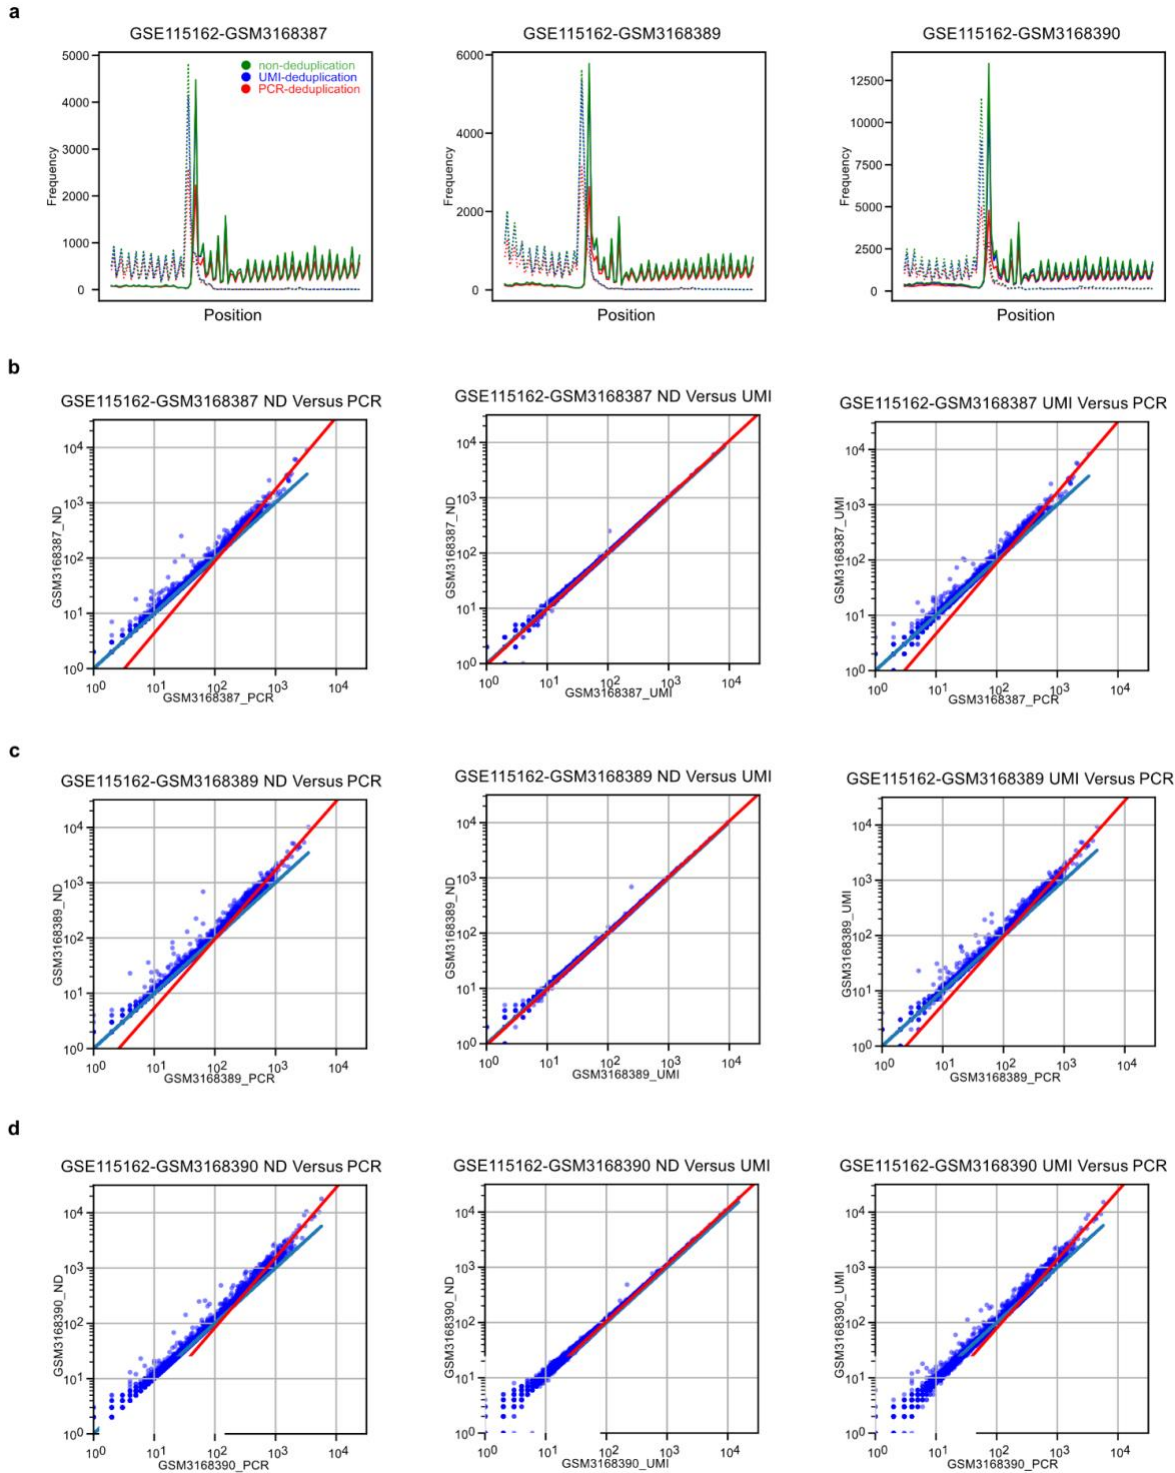

87

88 **ExtendedDataFig. 10 | PCR vs. UMI deduplication comparison for GSE115162:** Similar  
 89 analysis as ExtendedDataFig. 7 for GSM3168387 (RPFs range: 24-34 nt), GSM3168389 (RPFs

90 range: 23-33 nt), and GSM3168390 (RPFs range: 23-35 nt).

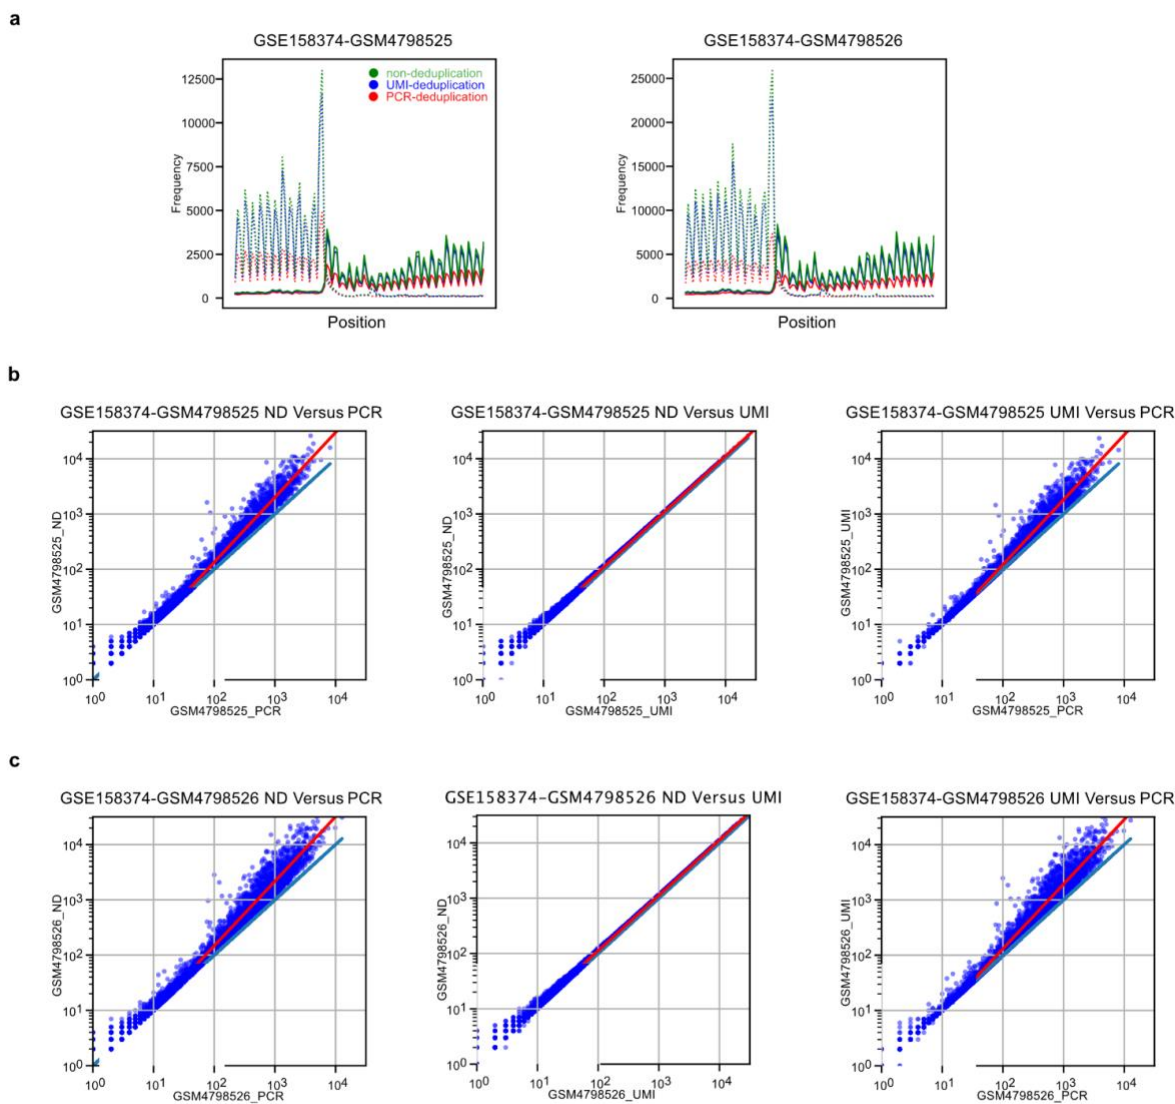

92

93 **ExtendedDataFig. 11 | PCR vs. UMI deduplication comparison for GSE158374:** Similar  
 94 analysis as figure S7 and S8 for GSM4798525 and GSM4798526, both in the 28-32 nt RPFs range.

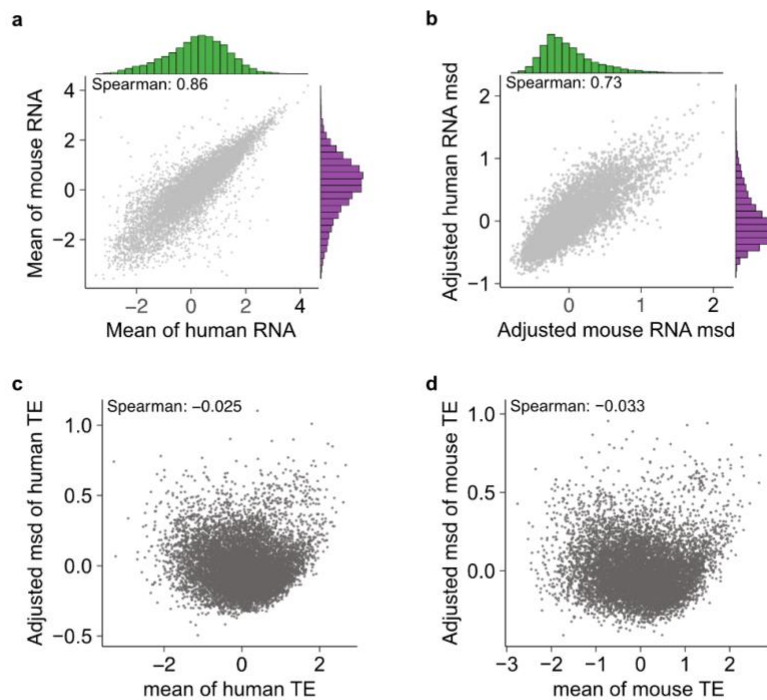

95

96 **ExtendedDataFig. 12 | Conservation of gene expression between human and mouse: a,** The  
 97 relationship between the mean RNA expressions (clr-transformed counts) of 9,194 orthologous  
 98 genes across two species is plotted. Dots represent genes in all figure panels. **b,** The variability of  
 99 genes' RNA expression was quantified with metric standard deviation (msd; Methods) across  
 100 different cell lines and tissues in either human or mouse. To account for the correlation between  
 101 mean RNA expression and its variability, we adjusted the msd values with their mean values  
 102 (Methods). **c,** The scatter plot shows the adjusted msd values (y-axis; Methods) and the average  
 103 TE across different cell types (x-axis) for human genes. **d,** Similar analysis as in panel c for mouse  
 104 genes.



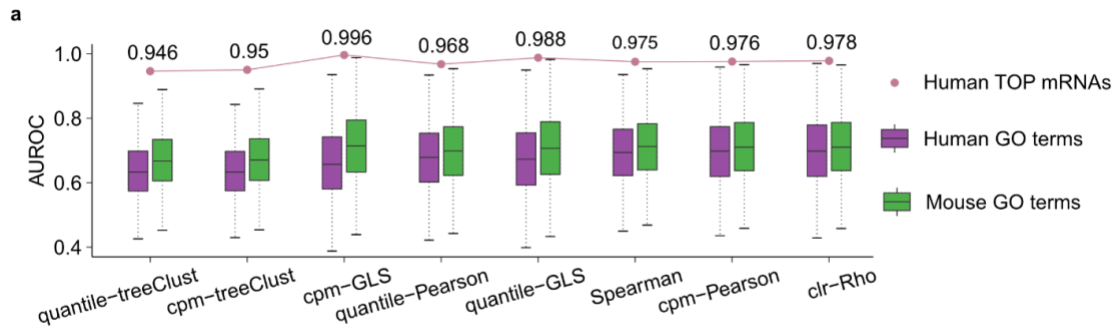

105

106 **ExtendedDataFig. 13 | Evaluating the performance of eight methods to associate ribosome**  
 107 **occupancy covariation with biological function: a**, The AUROCs for biological functions were  
 108 calculated using the similarity scores among genes at ribosome occupancy level determined by  
 109 eight distinct methods (Methods). In the boxplot, the horizontal line corresponds to the median.  
 110 The box represents the IQR and the whiskers extend to the largest value within 1.5 times the IQR  
 111 from the hinge. The dot in this figure represents the AUROC for human 5' TOP mRNAs.

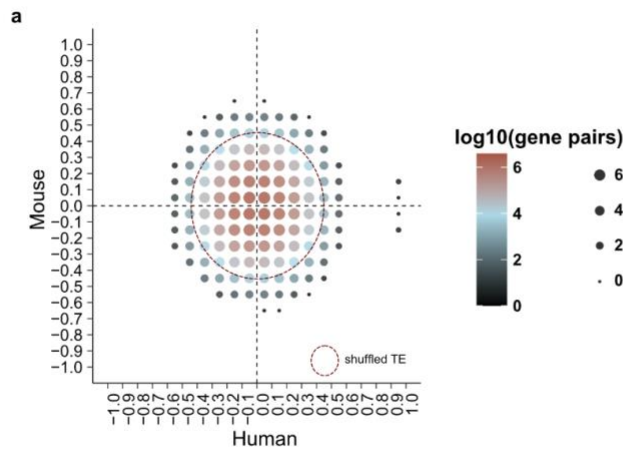

112

113 **ExtendedDataFig. 14 | Lack of correlation in TEC across orthologous gene pairs between**  
 114 **human and mouse using shuffled TE: a**, TE values that were randomly reassigned from the  
 115 original data for each gene (shuffled) and TEC was calculated. In the figure panel, we plotted the  
 116 number of orthologous gene pairs within specified ranges. Each dot represents the aggregated  
 117  $\log_{10}$ -transformed counts of these gene pairs. The dashed line captures 95% of the data.

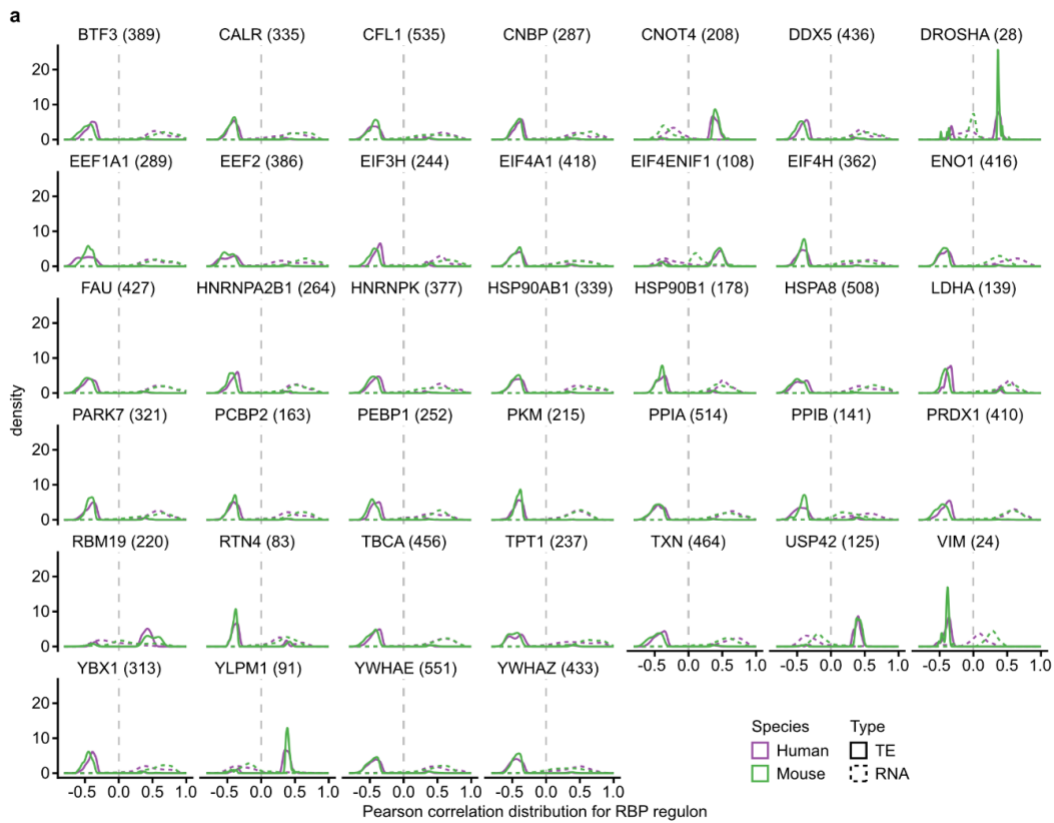

118

119 **ExtendedDataFig. 15 | RBP regulon correlation distribution for regulons with high TEC: a,**  
 120 Distribution of Pearson correlation coefficients between RBP RNA expression and TE of the  
 121 conserved regulon are shown for RBP regulons with mean  $\text{abs}(\text{TE } \rho) > 90^{\text{th}}$  percentile.  
 122 Ribosomal protein genes are omitted except for FAU, as a representative example. Numbers in  
 123 parentheses denote the number of genes in the conserved RBP regulon.

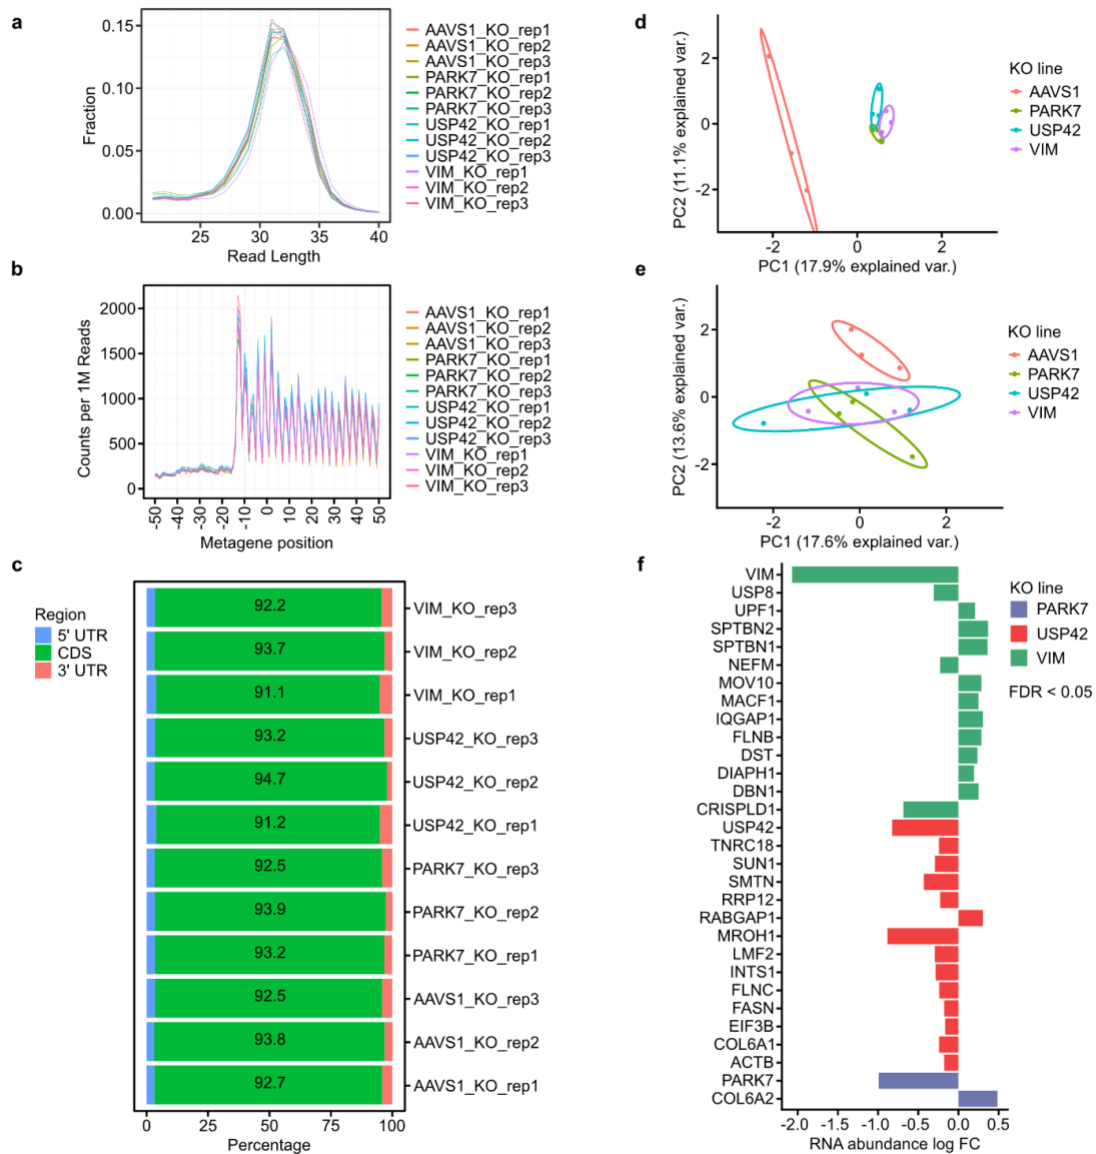

124

125 **ExtendedDataFig. 16 | Ribosome profiling and RNA-seq of RBP KO cell lines:** For b through  
 126 e, ribosome footprints between 28 and 35 nt were used. **a**, Read length distributions of ribosome  
 127 footprints. **b**, Metagene plot at the start site. **c**, Location of mapped ribosome footprints. **d**, PCA  
 128 was performed on standardized counts per million (CPM) reads for transcripts whose sum of CPMs  
 129 across cell lines and replicates is in the top 80<sup>th</sup> percentile. PCA of RNA-seq counts. **e**, Same as D  
 130 for ribosome profiling read counts. **f**, Differential RNA expression of KO cell lines. A significance  
 131 threshold of FDR < 0.05 was used.

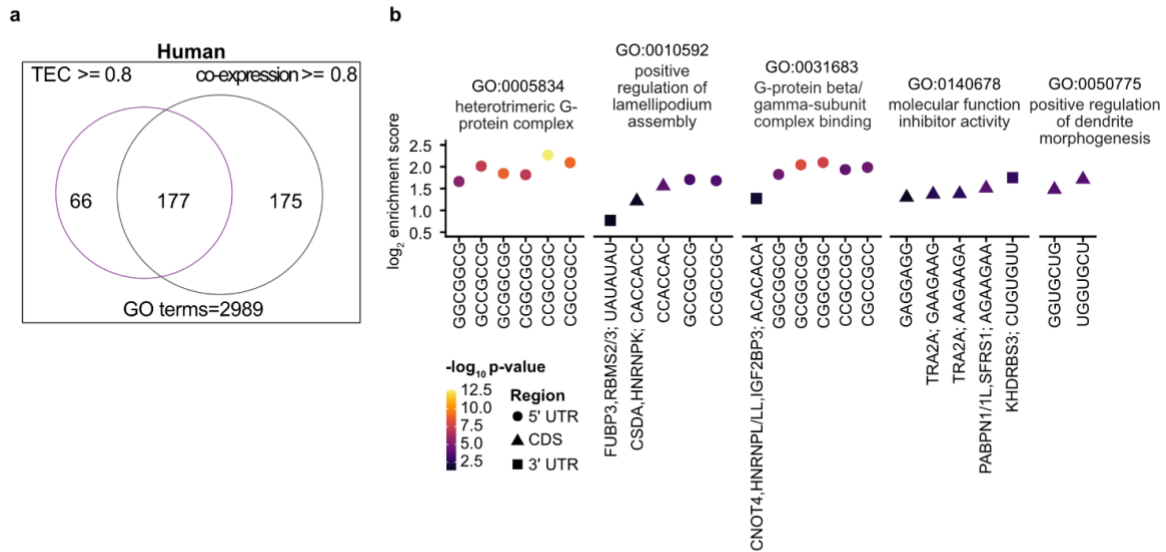

132

133 **ExtendedDataFig. 17 | TEC and RNA co-expression among genes with shared functions in**  
 134 **human: a**, A comparison between the number of human GO terms that have AUROC of 0.8 or  
 135 higher with either TEC or RNA co-expression. **b**, Motif enrichment in human GO terms. RNA  
 136 binding proteins (RBPs) from oRNAment<sup>134</sup> or Transite<sup>133</sup> are indicated. P-values were corrected  
 137 using the Holm method and those kmers with a p-value < 0.05 are shown.

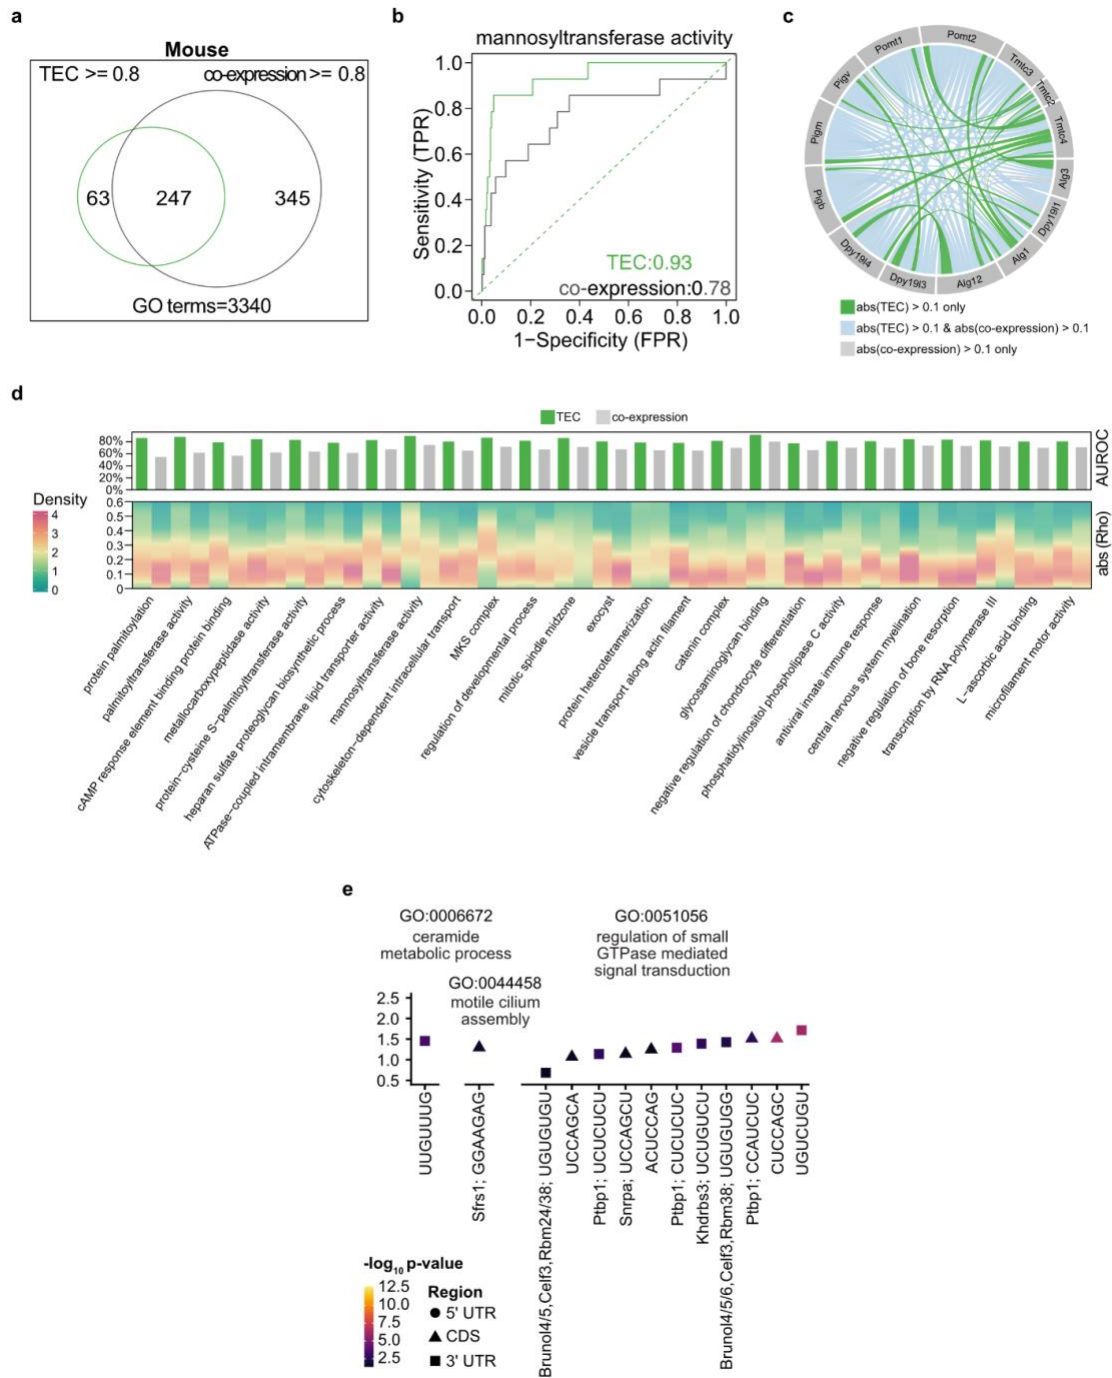

138

139 **ExtendedDataFig. 18 | TEC and RNA co-expression among genes with shared functions in**  
 140 **mouse: a**, Venn diagram for mouse GO terms that achieve an AUROC of 0.8 or higher with

141 proportionality scores ( $\rho$ ) among genes at either TE or RNA expression level. **b**, The AUROC  
142 plot was calculated with genes associated with mannosyltransferase activity in mice. **c**, The  
143 connections represent absolute  $\rho$  values above 0.1 in either TE pattern alone (green), in both  
144 RNA co-expression and TE pattern (blue), or RNA co-expression alone (gray). **d**, We summarized  
145 GO terms where genes exhibit greater similarity at the TE level than at the RNA expression level  
146 (AUROC with TEC > 0.8, and different AUROC between TEC and RNA co-expression > 0.1) in  
147 mice. We visualized the distribution of absolute  $\rho$  score for gene pairs within each specific GO  
148 term (bottom; gene pairs with  $|\rho| > 0.1$ ) at the TE level. **e**, Motif enrichment in mouse GO  
149 terms. RNA binding proteins (RBPs) from oRNAmotif<sup>134</sup> or Transite<sup>133</sup> are indicated. P-values  
150 were corrected using the Holm method and those kmers with a p-value < 0.05 are shown.

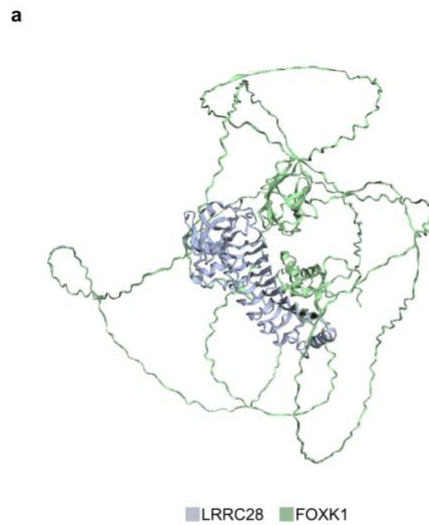

151

152 **ExtendedDataFig. 19 | 3D structure of the interaction between LRRC28 with FOXK1: a,**  
153 AlphaFold2-multimer predicted binding between LRRC28 and FOXK1.

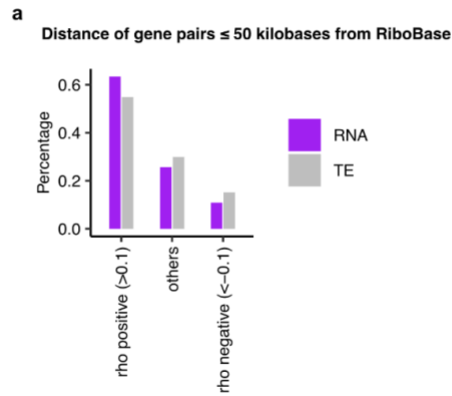

154

155 **ExtendedDataFig. 20 | Rho scores enrichment of gene pairs with a distance of less than 50**  
 156 **kilobases on the same chromosome: a**, Rho scores enrichment for 5,999 human gene pairs with  
 157 a distance of less than 50 kilobases at either RNA expression or TE level.

158

## 159 **Supplementary Text**

### 160 **1: Inaccurate and incomplete metadata examples from GEO**

161 We observed recurrent issues regarding cell line identification in GEO. For instance, several  
162 studies categorize cell lines merely as “erythroid cells” without providing specifics. Similarly,  
163 descriptions of mouse embryonic stem cells (mESCs) often lack detail regarding subtypes, such as  
164 v6.5, which are either vague or missing. Inconsistencies in library strategies present additional  
165 challenges. While most researchers categorize ribosome profiling under OTHER in the library  
166 strategy, some entries label ribosome profiling as RNA-seq, ncRNA-seq, and miRNA-seq. Such  
167 nonstandard information lead to significant errors in large-scale data reanalysis, emphasizing the  
168 need for data curation.

### 169 **2: Summary of sequencing quality for ribosome profiling and matched RNA-seq**

170 The median number of reads for all human ribosome profiling samples was approximately 43.2  
171 million, and after removing the adapter sequences the corresponding median was 35.5 million  
172 (ExtendedDataFig. 1a; table S2). For mouse samples, the median number of reads was around 37.5  
173 million, compared to 29.7 million reads with adapters (ExtendedDataFig. 1a; table S3). On  
174 average, only 17% of reads could be aligned to the transcriptome, with 13% having a mapping  
175 quality higher than 20 in human samples (ExtendedDataFig. 1c). After removing duplicate reads  
176 with the same position and length (PCR-deduplication), 5% of the total ribosome profiling reads  
177 were retained (ExtendedDataFig. 1c). The mouse data showed a similar trend, with 13% alignment,  
178 10% above a mapping quality of 20, and 3% retention after PCR-deduplication (ExtendedDataFig.  
179 1c).

180 Furthermore, in our comparative analysis between ribosome profiling and the corresponding RNA-  
181 seq data, we observed that ribosome profiling experiments were generally sequenced at a higher  
182 depth compared to RNA-seq. The median reads for ribosome profiling were 45.6 million for  
183 human experiments and 43.1 million for mouse experiments, compared to 36.2 million and 37.1  
184 million reads for the matched RNA-seq, respectively (ExtendedDataFig. 1b; table S4-5). However,  
185 ribosome profiling demonstrated a lower alignment percentage to transcriptome than RNA-seq,  
186 with only 13% in human and 14% in mouse experiments, as opposed to 48% and 47% in RNA-  
187 seq for human and mouse samples, respectively (ExtendedDataFig. 1d). This discrepancy is  
188 explained by the substantial presence of ribosomal RNA in ribosome profiling samples.

### 189 **3: Comparison of different methods for removing duplicated reads**

190 Removing duplicated reads with the same position and length is commonly used in sequencing  
191 data processing to minimize biases introduced by PCR amplification. A key concern is the  
192 inadvertent removal of ribosome footprints that are identical in sequence and length but originate  
193 from different templates, leading to misinterpretation of the data. To evaluate the impact of  
194 deduplication strategies on ribosome profiling data, we analyzed samples that incorporated unique  
195 molecular identifiers (UMIs). Our findings indicate a significant loss of reads originating from  
196 unique molecules when using PCR deduplication based on position and fragment length  
197 (ExtendedDataFig. 9-11). This discrepancy was exacerbated in samples with higher coverage.



198 Given the limited adoption of library preparation method that introduce UMIs in ribosome  
199 profiling experiments, we used a winsorizing-based method to process non-deduplicated ribosome  
200 profiling sequencing data, aiming to mitigate this bias by capping excessively high-depth regions  
201 (Methods).

202 We compared linear regression-based TE calculated by winsorized non-deduplicated and PCR-  
203 deduplicated data. The winsorized method showed a slightly higher mean correlation than the  
204 PCR-deduplicated method (ExtendedDataFig. 8b), indicating the PCR-based deduplication  
205 approach, which relies on identical position and length, could obscure the actual biological insights  
206 obtainable from ribosome profiling.

#### 207 **4: RBPs may coordinate TEC**

208 We identified RBP regulons in which the component genes had high TEC, as this might indicate  
209 a direct influence of the RBP on TE. Salient examples of RBPs which were previously linked to  
210 translation regulation and had conserved regulons with high TEC were VIM and PARK7 (also  
211 known as DJ-1). Although VIM is a primary component of intermediate filaments, its RNA  
212 expression was negatively correlated with TE of genes encoding proteins in the electron transport  
213 chain and ribosomal proteins. VIM was previously found to repress translation of the mu opioid  
214 receptor<sup>164</sup>. Similarly, expression of *PARK7* was predominantly negatively correlated with TE, in  
215 line with a prior study that *PARK7* represses translation<sup>165,166</sup> (68% and 79% of regulon genes  
216 having negative correlations in human and mouse, respectively). There was not a significant  
217 overlap between *PARK7* targets determined by RIP-seq analysis in human neuroblastoma cells<sup>165</sup>  
218 and the human or mouse *PARK7* regulons (hypergeometric test p-values 0.84 and 0.23,  
219 respectively). Nevertheless, thirty-three *PARK7* RIP-seq targets were present in both human and  
220 mouse regulons, including glutathione peroxidase 4 (*GPX4*), Sm-like proteins (*LSM1/3/5*), and six  
221 genes encoding ubiquinone-oxidoreductase subunits, indicating *PARK7* regulates a diverse set of  
222 biological processes extending beyond the oxidative stress response. Among genes with positive  
223 correlations with *PARK7* expression, subunits of calcium channels such as *CACNB1* and  
224 *CACNA2D1* were notable, consistent with data that *PARK7* increases nascent protein synthesis  
225 of *CACNA2D1* despite not significantly binding it<sup>166</sup>. Altogether, these data suggest largely  
226 indirect influences of *PARK7* on TE, and a smaller set of direct target genes.

227 We selected VIM, PARK7, and USP42 for further experiments, as their regulons exhibited distinct  
228 correlation distributions for RNA expression and gene TE (ExtendedDataFig. 15) and are not  
229 essential genes, facilitating knockout experiments. These RBPs had high Hydra<sup>167</sup> scores (>0.89,  
230 scale 0 to 1) and detectable RNA binding domains, supporting their role as *bona fide* RBPs.  
231 Surprisingly, knockout of these RBPs and subsequent matched ribosome profiling and RNA-seq  
232 (ExtendedDataFig. 16a-e, Methods) indicated no changes in TE for the genes in these RBPs'  
233 regulons, with one exception (*VIM* KO led to lower *VIM* TE). However, we found a small subset  
234 of genes with altered RNA abundance upon knockout of each RBP (ExtendedDataFig. 16f). For  
235 example, knockout of *VIM* led to increased RNA abundance of several genes involved in  
236 cytoskeletal function, including *SPTBN1*, *SPTBN2*, *MACF1*, *IQGAP1*, *FLNB*, *DST*, *DIAPH1*, and  
237 *DBN1*.

238 We note that the lack of genes with significantly altered TE upon KO of these RBPs may be due  
239 to several reasons: 1) these RBPs exert an indirect- rather than direct- influence on TE; 2) the  
240 associations between RBP expression and gene TE were identified across diverse cell lines,  
241 whereas the association was only tested in the HEK293T cell line; 3) use of heterogenous knockout  
242 populations (not single clones), and limited efficiency of knockout as measured by the observed  
243 RNA-seq fold changes (*PARK7*: 0.37, *USP42*: 0.44, *VIM*: 0.13) may limit sensitivity to observe  
244 effects on TE. Further work will be needed to validate the role of *PARK7*, *USP42*, and *VIM* on  
245 translational regulation.

## 246 **5: TEC among genes is associated with shared biological functions in mouse**

247 We identified 25 GO terms including protein palmitoylation, palmitoyltransferase activity, and  
248 metalloprotease activity which exhibited AUROC scores that were at least 0.1 lower at  
249 the RNA expression level compared to the TE level (AUROC calculated with  $TEC > 0.8$ ;  
250 ExtendedDataFig. 18). For example, mannosyltransferase activity demonstrated a significant  
251 difference between the two levels (ExtendedDataFig. 18c). This difference was further highlighted  
252 by the observation that 22 gene pairs in this biological function had absolute rho above 0.1  
253 exclusively at the TE level, compared to only two at the RNA expression level for this term  
254 (ExtendedDataFig. 18d). In summary, we found genes from certain biological functions are more  
255 likely to be regulated at the translational level rather than the transcriptional level, in both humans  
256 and mice.

257 We predicted novel functions for genes associated with 31 mouse GO terms. These predictions are  
258 based on either significant covariation in TE greater than RNA expression (AUROC measured  
259 with  $TEC > 0.8$ ; different AUROC measured with TEC and RNA co-expression  $> 0.1$ ; table S16;  
260 Methods) or new functional predictions were only achievable with TEC (AUROC measured with  
261  $TEC > 0.8$ , difference AUROC measured with TEC and RNA co-expression  $< 0.1$ , ranking of the  
262 predicted gene with RNA co-expression  $< \text{top } 50\%$ ; table S16; Methods). For instance, we  
263 identified *Cenpf* as highly correlated with the function of mitotic spindle midzone. This aligned  
264 with findings in human cell lines, where CENP-F has been observed assembling onto kinetochores  
265 at late G2 and detected at the spindle midzone during anaphase<sup>151</sup>. Another prediction linked  
266 *Arhgap31* with the antiviral innate immune response. This prediction has been supported by  
267 previous research that has recognized the ARHGAP family as novel biomarkers associated with  
268 immune infiltration<sup>158</sup>.
